# Supplementary material for: Benefits of Short-Duration, High-Stocking Rate Opportunistic Grazing on Arid Rangelands During Favorable Conditions
Source: Frontiers journal article supplement (doi:10.3389/fevo.2021.757764), 2021-12-02
Supplement: Table_1.docx [file Table_1.docx]

**Supplementary Appendices**

**Appendix 1.** List of perennial and annual species of the continuous grazing sites (controls) for each community.

|  | *A. henoniana* | *H. schmittianum* | *R. raetam* |
| --- | --- | --- | --- |
| **Perennial species** |  |  |  |
| *Argyrolobium uniflorum* | + | + | + |
| *Atractylis serratuloides* | + | + | + |
| *Fagonia glutinosa* | + | + | + |
| *Haloxylon schmittianum* | + | + | + |
| *Haloxylon scoparium* | + | + | + |
| *Kickxia aegyptiaca* | + | + | + |
| *Retama raetam* | + | + | + |
| *Salsola vermiculata* | + | + | + |
| *Salvia aegyptiaca* | - | + | + |
| **Annual species** |  |  |  |
| *Anacyclus clavatus* | + | + | + |
| *Anacyclus monanthos* | + | + | + |
| *Anchusa hispida* | + | + | + |
| *Asphodelus tenuifolius* | + | + | + |
| *Atractylis carduus* | + | + | + |
| *Catananche arenaria* | + | + | + |
| *Centaurea furfuracea* | + | + | + |
| *Erodium laciniatum* | + | + | + |
| *Ifloga spicata* | + | + | + |
| *Launaea fragilis* | + | + | + |
| *Lotus halophilus* | + | + | + |
| *Medicago minima* | + | + | + |
| *Pallenis hierochuntica* | + | + | + |
| *Paronychia arabica* | + | + | + |
| *Phalaris minor* | + | + | + |
| *Plantago ovata* | + | + | + |
| *Stipa capensis* | - | + | + |
| *Volutaria lippii* | + | + | + |
