# Supplementary material for: Benefits of Short-Duration, High-Stocking Rate Opportunistic Grazing on Arid Rangelands During Favorable Conditions
Source: Frontiers journal article supplement (doi:10.3389/fevo.2021.757764), 2021-12-02
Supplement: Table_3.docx [file Table_3.docx]

**Supplementary Appendices**

**Appendix 3.** List of annual species under different grazing treatments (BG, before one week intense grazing; AG, after one week intense grazing) for each community.

|  | *A. henoniana* | | *H. schmittianum* | | *R. raetam* | |
| --- | --- | --- | --- | --- | --- | --- |
| Annual species | BG | AG | BG | AG | BG | AG |
| *Anacyclus clavatus* | + | - | + | - | + | - |
| *Anacyclus monanthos* | + | - | + | + | + | + |
| *Anchusa hispida* | - | - | - | - | - | - |
| *Arnebia decumbens* | - | - | + | + | - | - |
| *Asphodelus tenuifolius* | - | - | - | - | + | + |
| *Astragalus corrugatus* | - | - | + | - | - | - |
| *Atractylis carduus* | - | - | + | + | + | + |
| *Calendula arvensis* | - | - | + | - | - | - |
| *Catananche arenaria* | - | - | - | - | - | - |
| *Centaurea furfuracea* | - | - | + | - | + | - |
| *Convolvulus arvensis* | - | - | + | - | + | - |
| *Cuscuta epithymum* | + | - | - | - | + | - |
| *Cutandia dichotoma* | - | - | + | - | + | + |
| *Daucus sahariensis* | - | - | + | + | + | + |
| *Diplotaxis harra* | + | + | - | - | - | - |
| *Echium humile* | + | - | + | - | + | - |
| *Emex spinosa* | - | - | - | - | + | - |
| *Erodium glaucophyllum* | + | + | - | - | + | + |
| *Erodium laciniatum* | + | - | + | + | + | - |
| *Filago germanica* | - | - | - | - | + | + |
| *Hippocrepis areolata* | + | - | + | - | - | - |
| *Ifloga spicata* | - | - | + | + | + | + |
| *Koelpinia linearis* | - | - | - | - | + | - |
| *Launaea angustifolia* | + | + | + | - | + | - |
| *Launaea fragilis* | - | - | + | - | + | + |
| *Launaea nudicaulis* | + | - | - | - | + | - |
| *Launaea quercifolia* | + | - | - | - | - | - |
| *Lobularia libyca* | - | - | - | - | + | - |
| *Lotus halophilus* | - | - | - | - | - | - |
| *Matthiola longipetala* | - | - | - | - | + | - |
| *Medicago laciniata* | + | - | + | - | - | - |
| *Medicago minima* | - | - | - | - | - | - |
| *Pallenis hierochuntica* | + | + | - | - | + | - |
| *Paronychia arabica* | - | - | + | - | + | - |
| *Phalaris minor* | - | - | - | - | + | - |
| *Picris asplenioides* | - | - | + | - | + | - |
| *Plantago coronopus* | - | - | + | - | + | - |
| *Plantago ovata* | - | - | - | - | + | - |
| *Schismus barbatus* | - | - | + | - | + | + |
| *Stipa capensis* | + | + | + | - | + | - |
| *Volutaria lippii* | + | + | - | - | + | - |
